# Supplementary material for: Radiation-induced SOD2 overexpression sensitizes colorectal cancer to radiation while protecting normal tissue
Source: PubMed Central journal article supplement (PMC5352361; doi:10.18632/oncotarget.13954), 2016-12-15
Supplement: oncotarget-08-7791-s001.pdf [file oncotarget-08-7791-s001.pdf]

## Radiation-induced SOD2 overexpression sensitizes colorectal cancer to radiation while protecting normal tissue

### Supplementary Materials

#### Construction of lentiviral vectors

The lentiviral vector pLVX-AcGFP1-N1 (Takara Biomedical Technology, Beijing, China) was used as backbone vector (Supplementary Figure S2A). The chimeric promoter C<sub>9</sub>BC fragment was synthesized by the Beijing Genomics Institute (BGI, Beijing, China). The 5' end of the gene fragment contains restriction site Cla I (Takara, Dalian, China), and 3' end contains Xho I (Takara). The C<sub>9</sub>BC fragment and the backbone vector were digested by Cla I and Xho I respectively, purified by Gel Extraction Kit (Omega Bio-tek, Norcross, Georgia, USA), and linked by ligase to generate the reporter vector pLVX-C<sub>9</sub>BC-AcGFP1-N1 (Supplementary Figure S2B).

The SOD2 cDNA sequence was achieved by RT-PCR and amplified by PCR method, with 5' end containing restriction site Xho I and 3' end containing BspT104 I. The SOD2 cDNA amplified products and the reporter vector pLVX-C<sub>9</sub>BC-AcGFP1-N1 were digested by Xho I and BspT104 I respectively, purified by Gel Extraction Kit, and linked by ligase to generate the intermediate vector pLVX-C<sub>9</sub>BC-SOD2-AcGFP1 (Supplementary Figure S2C).

Two complementary T2A single strand DNA sequences were synthesized by BGI, with 5' end containing restriction site BspT104 I and 3' end containing

Apa I. The two complementary DNA sequences were annealed in annealing buffer. The intermediate vector pLVX-C<sub>9</sub>BC-SOD2-AcGFP1 was digested by BspT104 I and Apa I. Subsequently, the annealed T2A DNA sequence and the purified vector restriction fragment were linked by ligase to generate the therapeutic vector pLVX-C<sub>9</sub>BC-SOD2-T2A-AcGFP1 (Supplementary Figure S2D).

#### Packaging of lentivirus and infection of HT-29 cells

The three-plasmid package system (Addgene, Cambridge, Massachusetts, USA. packaging plasmid psPAX2 and envelop plasmid pMD2.G) was used for virus package manipulation in a grade 2 biosafety cabinet. 293FT cells were used, and plasmid transfection was performed with liposomes. After 48 h and 72 h, virus supernatant was collected and ultra-centrifuged at  $50000 \times g$  for 2.5 h. After the virus pellet was dissolved in 100  $\mu$ L of Opti-MEM, virus titers were determined using quantitative PCR. Target cells were seeded, and the amount of virus was calculated based on the multiplicity of infection (MOI) value of the cell line. After 48 h of infection, stably transfected cell lines were screened using puromycin.

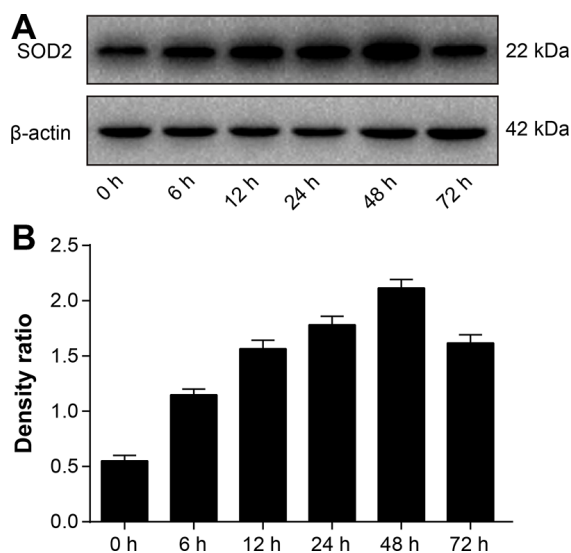

**Supplementary Figure S1: Analysis of radiation-induced features of the therapeutic vector.** (A) The SOD2 expression in HT-29 cells was assessed by Western blot.  $\beta$ -actin served as an internal control. (B) Quantification of SOD2 expression at different time after receiving 2Gy doses of radiation.

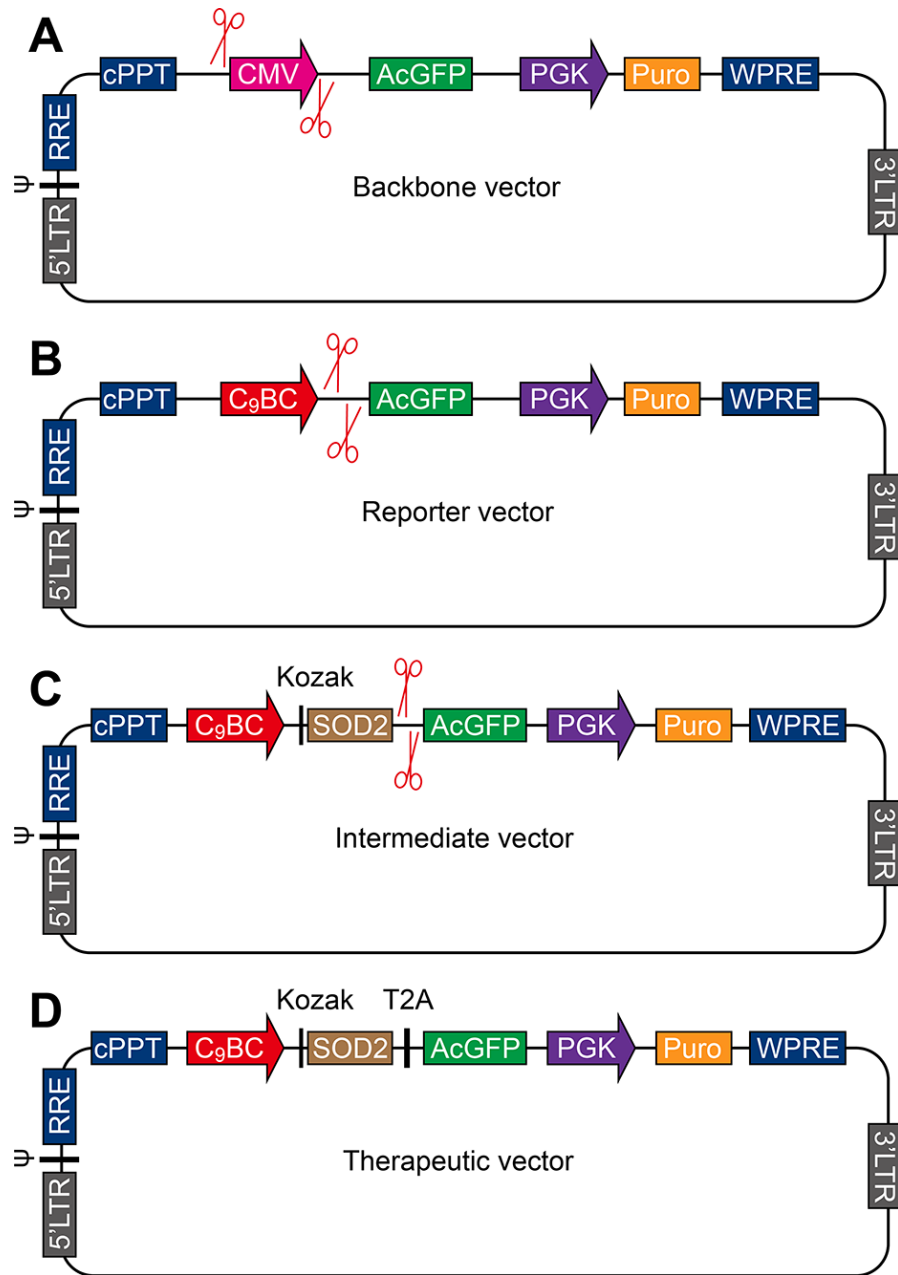

**Supplementary Figure S2: The construction of lentiviral expression vectors used in this study.** (A) the backbone vector (pLVX-AcGFP1-N1): The green fluorescent protein (GFP) is driven by human cytomegalovirus immediate early promoter (PCMV). (B) the reporter vector (pLVX-C9BC-AcGFP1-N1): The PCMV was replaced by C9BC chimeric promoter by digestion and connection techniques. (C) the intermediate vector (pLVX-C9BC-SOD2-AcGFP1): The coding sequences of SOD2 was placed downstream of C9BC promoter. (D) the therapeutic vector (pLVX-C9BC-SOD2-T2A-AcGFP1): The T2A sequence was inserted between the coding sequences of SOD2 and GFP and was kept in-frame with the GFP coding sequence .

**Supplementary Table S1: Primers used in this study**

| primer                          | sequence                                                             | template                  |
|---------------------------------|----------------------------------------------------------------------|---------------------------|
| C <sub>9</sub> BC amplifying F  | CGACGGCCAGTCAA                                                       | C <sub>9</sub> BC-PUC19   |
| C <sub>9</sub> BC amplifying R  | CGCCAAAAGCTTCTC                                                      | C <sub>9</sub> BC-PUC19   |
| C <sub>9</sub> BC identifying F | TTCGGGTTTATTACAGGG                                                   | pLVX-C9BC-AcGFP1-N1       |
| C <sub>9</sub> BC identifying R | GTGTCTTCTATGGAGGTCAA                                                 | pLVX-C9BC-AcGFP1-N1       |
| C <sub>9</sub> BC sequencing F  | TGATAGTAGGAGGCTTGGTAGGTT                                             | pLVX-C9BC-AcGFP1-N1       |
| C <sub>9</sub> BC sequencing R  | CATGCCGTGGGTGATGG                                                    | pLVX-C9BC-AcGFP1-N1       |
| SOD2 amplifying F               | GCGCTCGAGGCCACCATGTTGAGCCGGGC                                        | cDNA of SOD2              |
| SOD2 amplifying R               | CGCTTCGAACTTTTTGCAAGCCATGTATCTTTCAG                                  | cDNA of SOD2              |
| SOD2 identifying F              | CGACCTGCCCTACGACT                                                    | pLVX-C9BC-SOD2-AcGFP1     |
| SOD2 identifying R              | GCTTCCAGCAACTCCC                                                     | pLVX-C9BC-SOD2-AcGFP1     |
| SOD2 sequencing F               | GCTGTTTTGACCTCCATAGA                                                 | pLVX-C9BC-SOD2-AcGFP1     |
| T2A annealing F                 | CGAAGAGGGCAGAGGAAGTCTTCTAACAT<br>GCGGTGACGTGGAGGAGAATCCCGGCCCTCGGGCC | –                         |
| T2A annealing R                 | CGAGGGCCGGGATTCTCCTCCACGTCACCGCATG<br>TTAGAAGACTTCCTCTGCCCTCTT       | –                         |
| T2A identifying F               | ACCTGCCCTACGACTACG                                                   | pLVX-C9BC-SOD2-T2A-AcGFP1 |
| T2A identifying R               | AAGACTTCCTCTGCCCTC                                                   | pLVX-C9BC-SOD2-T2A-AcGFP1 |
| T2A sequencing F                | GCTGTTTTGACCTCCATAGA                                                 | pLVX-C9BC-SOD2-T2A-AcGFP1 |
| WPRE amplifying F               | CGCGTCTGGAACAATCAACC                                                 | cDNA of WPRE (realtime)   |
| WPRE amplifying R               | GTTGCGTCAGCAAACACAGT                                                 | cDNA of WPRE (realtime)   |
| GAPDH amplifying F              | AGCCTCAAGATCATCAGCAA                                                 | cDNA of GAPDH (realtime)  |
| GAPDH amplifying R              | GTCATGAGTCCTTCCACGATAC                                               | cDNA of GAPDH (realtime)  |
